# Supplementary material for: RNA-seq analysis identifies an intricate regulatory network controlling cluster root development in white lupin
Source: BMC Genomics. 2014 Mar 25;15:230. doi: 10.1186/1471-2164-15-230 (PMC4028058; doi:10.1186/1471-2164-15-230)

**La-miR156**  
**(LAGL02\_12766)**

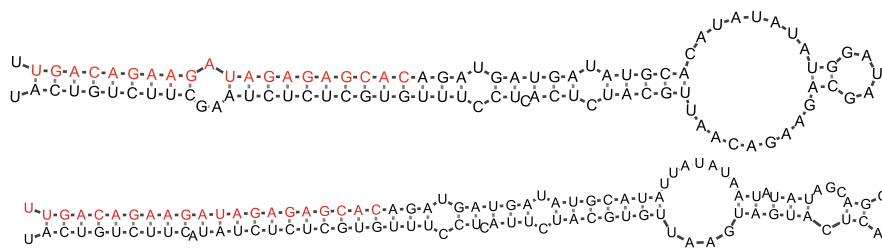

## Gmax-miR156e

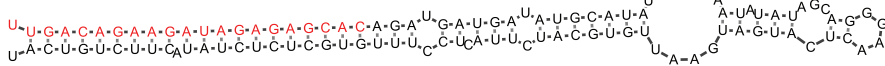

**La-miR159**  
**(LAGL02\_30707)**

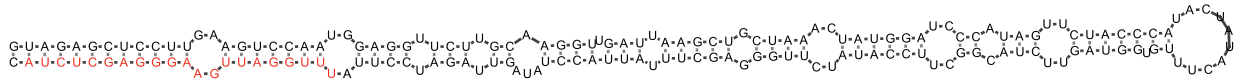

## Gmax-miR159b

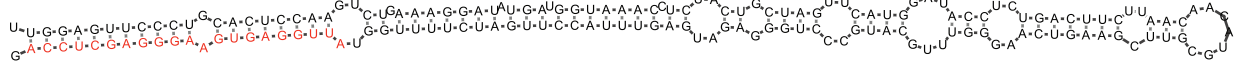

**La-miR160**  
**(LAGL02\_10727)**

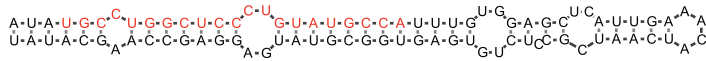

## Gmax-miR160a

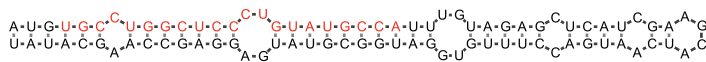

**La-miR162**  
**(LAGI02\_69978)**

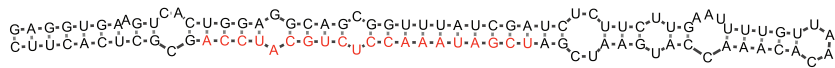

## Gmax-miR162a

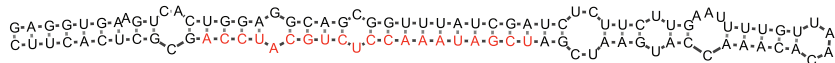

**La-miR166**  
**(LAGL02\_60624)**

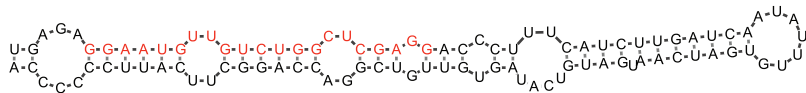

## Gmax-miR166a

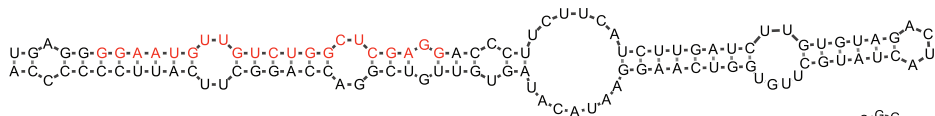

**La-miR168**  
**(LAGI02\_8882)**

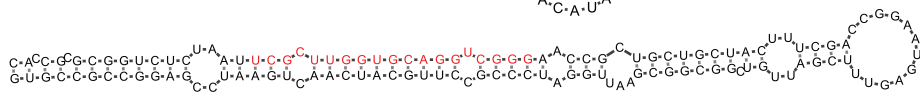

## Gmax-miR168b

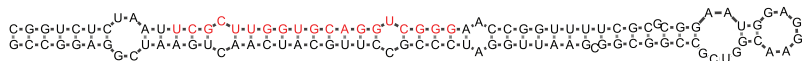

**La-miR172**  
(LAGI02\_19427)

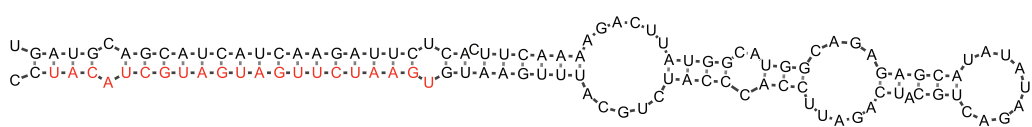

## Gmax-miR172a

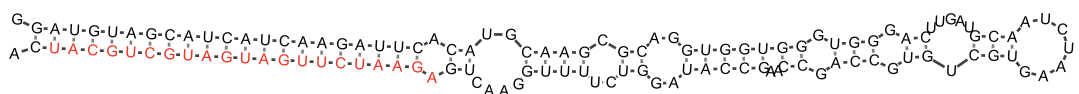

**La-miR393**  
**(LAGI02\_14424)**

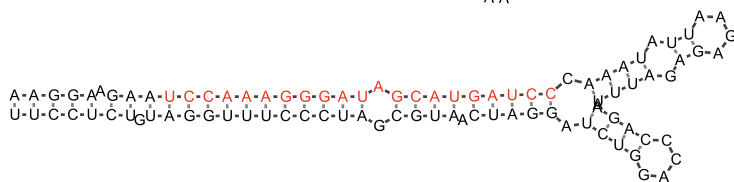

## Gmax-miR393c

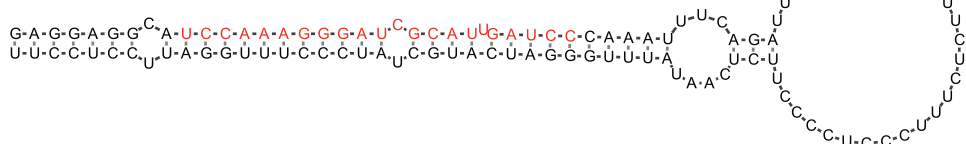

**La-miR396**  
**(LAGL02\_63083)**

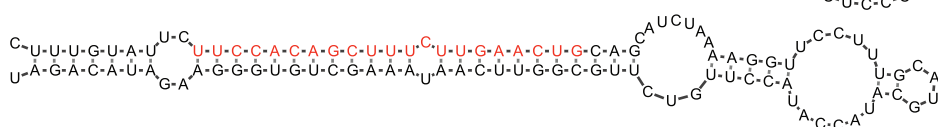

## Gmax-miR396a

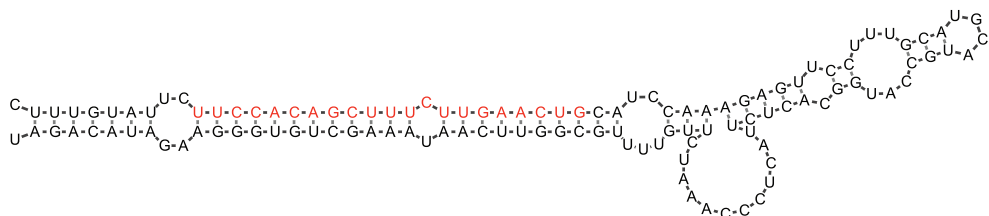

Supplement: Additional file 12 — Secondary structures for white lupin and soybean pre-miRNA hairpins. Shown are the hairpin structures of white lupin pre-miRNA and their corresponding homologs in soybean with sequences of mature miRNAs in red. Hairpin structures were predicted using the Vienna websuite (http://rna.tbi.univie.ac.at/) and compared to predictions for homologs in miRBase (http://www.mirbase.org/). [file 1471-2164-15-230-S12.pdf]
