# Supplementary material for: RNA-seq analysis identifies an intricate regulatory network controlling cluster root development in white lupin
Source: PubMed Central journal article supplement (PMC4028058; doi:10.1186/1471-2164-15-230), 2014-03-25

**A**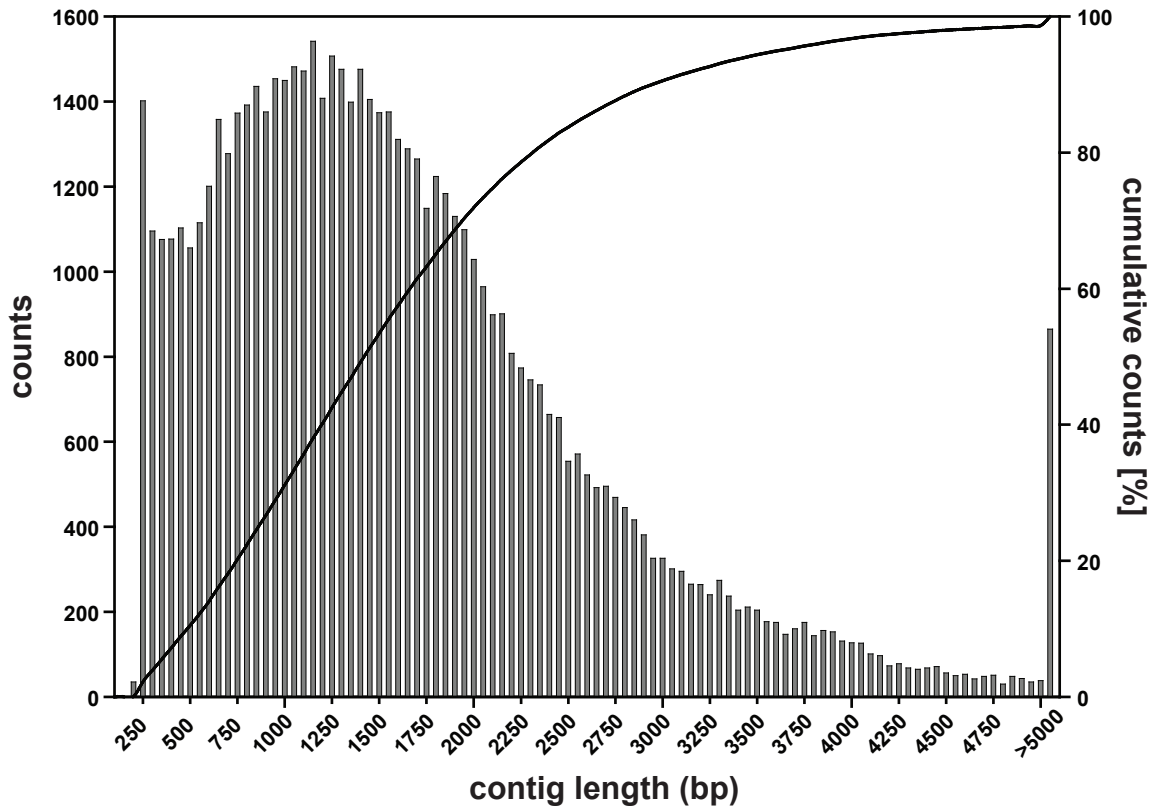**B**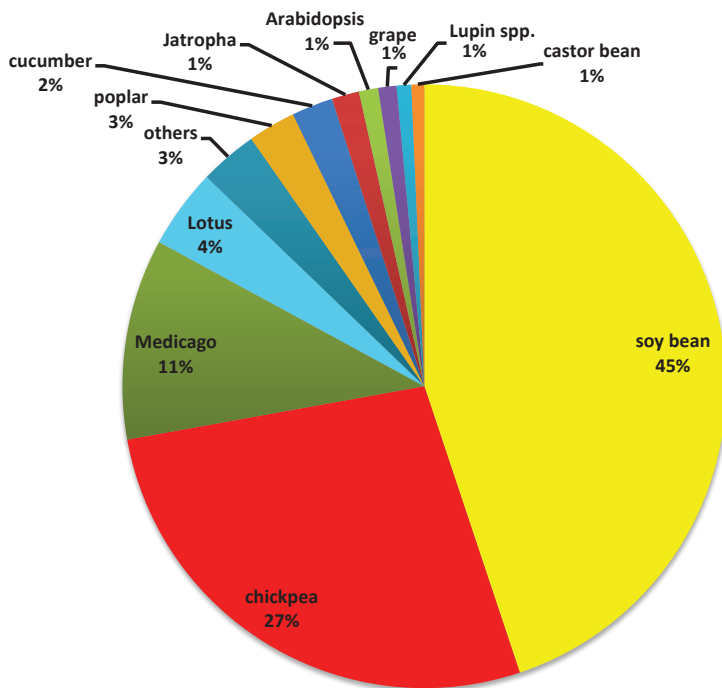

Supplement: 1471-2164-15-230-S4.pdf [file 1471-2164-15-230-S4.pdf]
