# Supplementary material for: RNA-seq analysis identifies an intricate regulatory network controlling cluster root development in white lupin
Source: PubMed Central journal article supplement (PMC4028058; doi:10.1186/1471-2164-15-230), 2014-03-25
Supplement: 1471-2164-15-230-S6.pdf [file 1471-2164-15-230-S6.pdf]

**LAGI02**

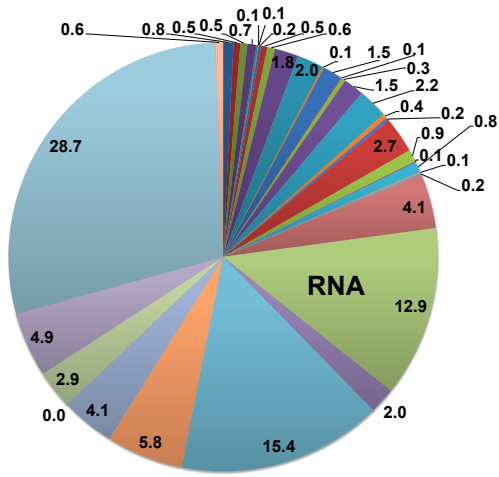

**Gmax\_189**

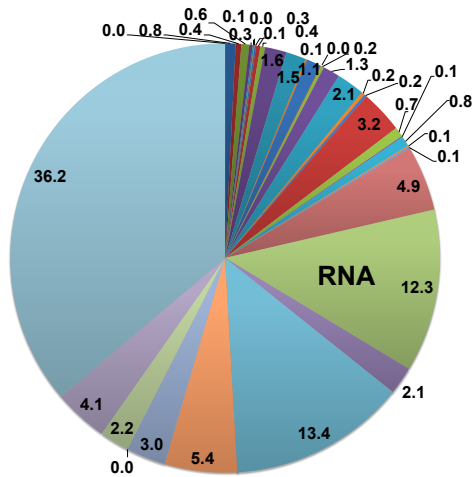

**TAIR10**

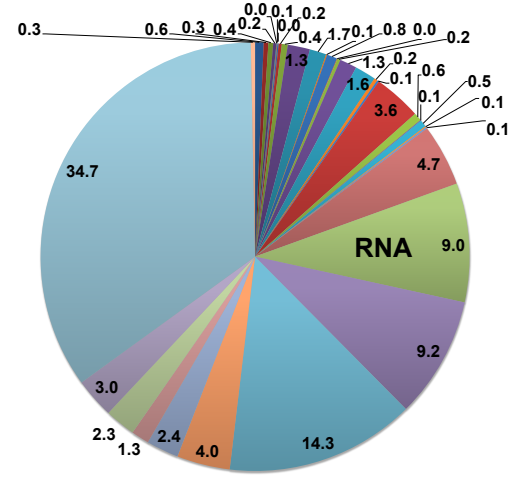

- 1. PS
- 2. major CHO metabolism
- 3. minor CHO metabolism
- 4. glycolysis
- 5. fermentation
- 6. gluconeogenesis / glyoxylate cycle
- 7. OPP
- 8. TCA / org transformation
- 9. mitochondrial electron transport / ATP synthesis
- 10. cell wall
- 11. lipid metabolism
- 12. N-metabolism
- 13. amino acid metabolism
- 14. S-assimilation
- 15. metal handling
- 16. secondary metabolism
- 17. hormone metabolism
- 18. co-factor and vitamine metabolism
- 19. tetrapyrrole synthesis
- 20. stress
- 21. redox
- 22. polyamine metabolism
- 23. nucleotide metabolism
- 24. biodegradation of xenobiotics
- 25. C1-metabolism
- 26. misc
- 27. RNA
- 28. DNA
- 29. protein
- 30. signalling
- 31. cell
- 32. micro RNA, natural antisense etc
- 33. development
- 34. transport
- 35. not assigned
- 991. mineral nutrition
