# Supplementary material for: RNA-seq analysis identifies an intricate regulatory network controlling cluster root development in white lupin
Source: PubMed Central journal article supplement (PMC4028058; doi:10.1186/1471-2164-15-230), 2014-03-25
Supplement: 1471-2164-15-230-S8.pdf [file 1471-2164-15-230-S8.pdf]

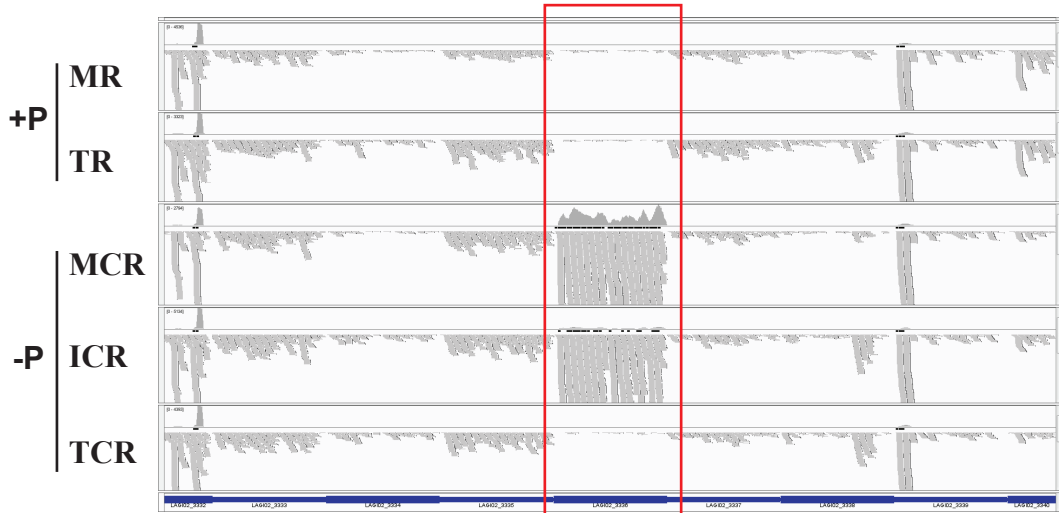

*MLS*  
(LAGI02\_3336)

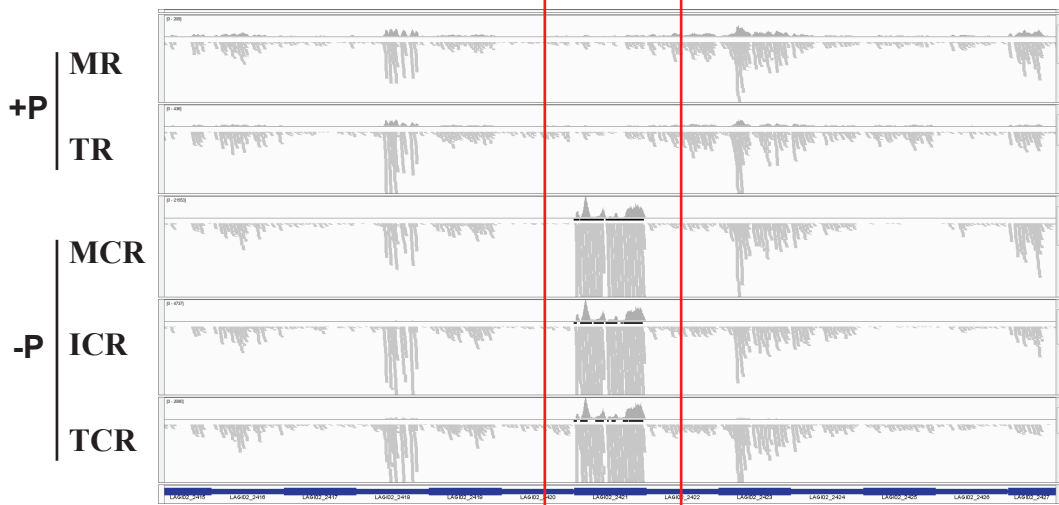

*PAPI0*  
(LAGI02\_2421)

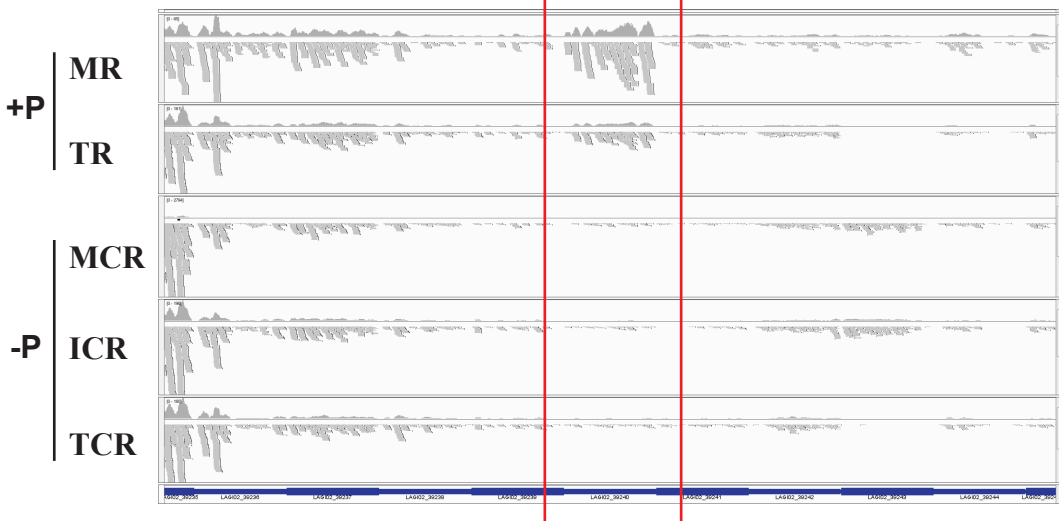

*PHO2*  
(LAGI02\_39240)
