# Supplementary material for: RNA-seq analysis identifies an intricate regulatory network controlling cluster root development in white lupin
Source: PubMed Central journal article supplement (PMC4028058; doi:10.1186/1471-2164-15-230), 2014-03-25

## MCR vs. MR

### P transporters

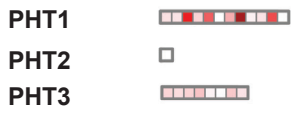

### Regulation

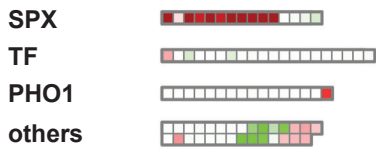

### Metabolism

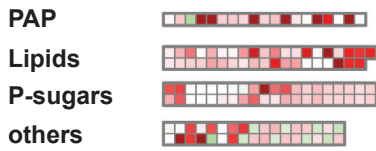

## TCR vs. TR

### P transporters

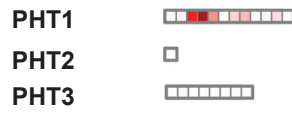

### Regulation

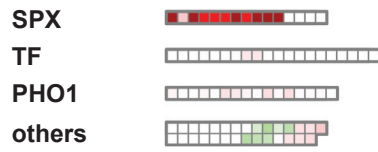

### Metabolism

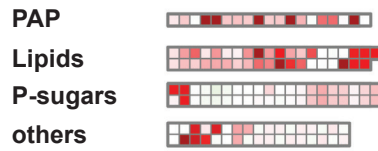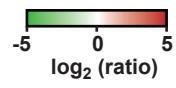

Supplement: 1471-2164-15-230-S9.pdf [file 1471-2164-15-230-S9.pdf]
