# Supplementary material for: RNA-seq analysis identifies an intricate regulatory network controlling cluster root development in white lupin
Source: PubMed Central journal article supplement (PMC4028058; doi:10.1186/1471-2164-15-230), 2014-03-25

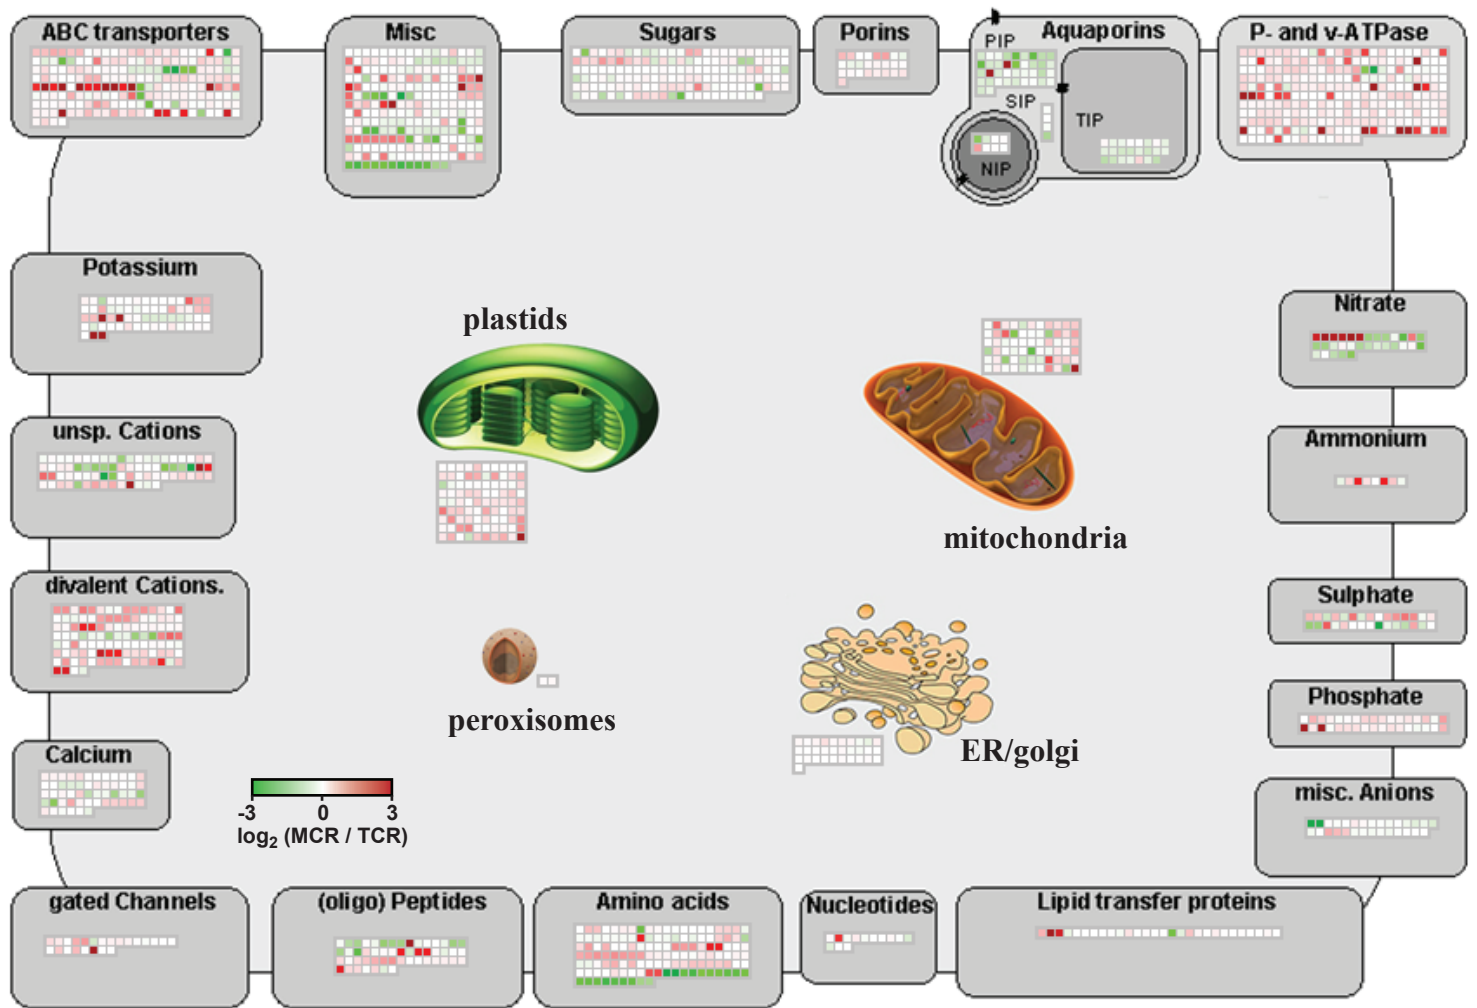

Supplement: 1471-2164-15-230-S10.pdf [file 1471-2164-15-230-S10.pdf]
