# Supplementary material for: RNA-seq analysis identifies an intricate regulatory network controlling cluster root development in white lupin
Source: BMC Genomics. 2014 Mar 25;15:230. doi: 10.1186/1471-2164-15-230 (PMC4028058; doi:10.1186/1471-2164-15-230)
Supplement: Additional file 5 — Classification of LAGI02 contigs to gene ontology (GO) terms. LAGI02 contigs were assigned to plant GOslim terms within each of the three main ontologies biological process, cellular component and molecular function. For comparison the distribution of GOslim terms for LAGI02 and the soybean (genome release Gmax_189) classification are shown. Numbers give percentages of each GOslim term within main ontologies. [file 1471-2164-15-230-S5.pdf]

## biological process

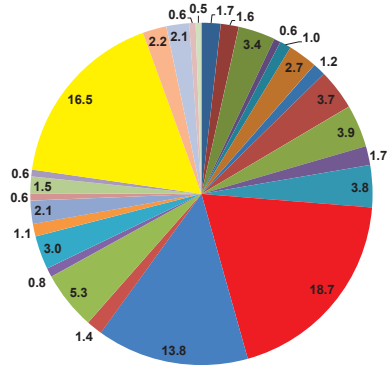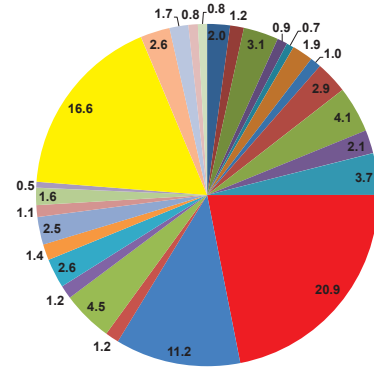

- reproduction
- carbohydrate metabolic process
- nucleobase-containing compound metabolic process
- DNA metabolic process
- translation
- cellular protein modification process
- lipid metabolic process
- transport
- response to stress
- signal transduction
- multicellular organismal development
- biological\_process
- metabolic process
- catabolic process
- biosynthetic process
- response to biotic stimulus
- response to abiotic stimulus
- anatomical structure morphogenesis
- response to endogenous stimulus
- embryo development
- post-embryonic development
- flower development
- cellular process
- cellular component organization
- protein metabolic process
- cell differentiation
- growth

## cellular component

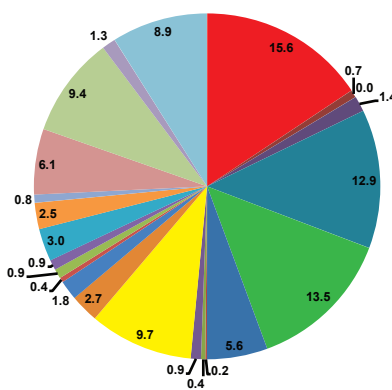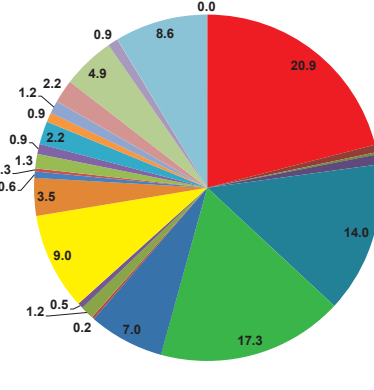

- cellular\_component
- extracellular region
- proteinaceous extracellular matrix
- cell wall
- intracellular
- cell
- nucleus
- nuclear envelope
- nucleoplasm
- nucleolus
- cytoplasm
- mitochondrion
- vacuole
- peroxisome
- endoplasmic reticulum
- golgi apparatus
- cytosol
- ribosome
- cytoskeleton
- plasma membrane
- plastid
- thylakoid
- membrane

## molecular function

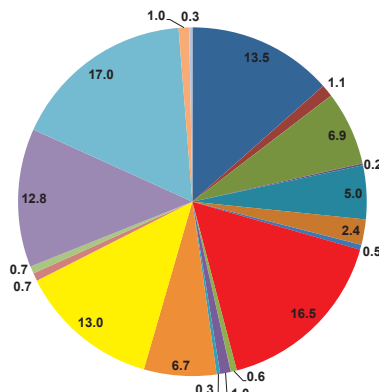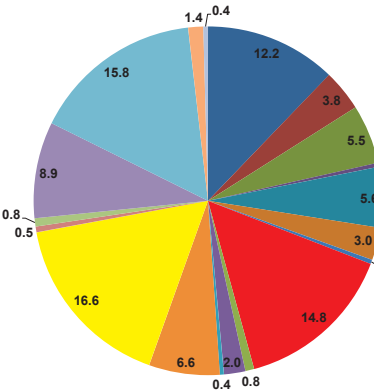

- nucleotide binding
- molecular\_function
- DNA binding
- chromatin binding
- sequence-specific DNA binding
- transcription factor activity
- RNA binding
- motor activity
- catalytic activity
- nuclease activity
- signal transducer activity
- receptor activity
- transporter activity
- protein binding
- translation factor activity, nucleic acid binding
- lipid binding
- kinase activity
- transferase activity
- enzyme regulator activity
- carbohydrate binding
